# Supplementary material for: Validation of Acute Myocardial Infarction and Heart Failure Diagnoses in Hospitalized Patients With the Nationwide Claim-Based JROAD-DPC Database
Source: PubMed Central journal article supplement — Circ Rep. 2021 Feb 20;3(3):131–6. doi: 10.1253/circrep.CR-21-0004 (PMC7956876; doi:10.1253/circrep.cr-21-0004), 2021-02-20
Supplement: circrep-3-131-s001.pdf [file circrep-3-131-s001.pdf]

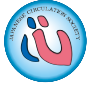

---

## **Validation of Acute Myocardial Infarction and Heart Failure Diagnoses in Hospitalized Patients With the Nationwide Claim-Based JROAD-DPC Database**

---

Michikazu Nakai, PhD; Yoshitaka Iwanaga, MD, PhD; Yoko Sumita;  
Koshiro Kanaoka, MD; Rika Kawakami, MD, PhD; Masanobu Ishii, MD, PhD;  
Keiji Uchida, MD, PhD; Nobutaka Nagano, MD, PhD; Takeo Nakayama, MD, PhD;  
Kunihiro Nishimura, MD, PhD; Kazufumi Tsuchihashi, MD, PhD; Kazuo Kimura, MD, PhD;  
Yoshihiro Saito, MD, PhD; Kenichi Tsujita, MD, PhD; Hisao Ogawa, MD, PhD;  
Yoshihiro Miyamoto, MD, PhD; Satoshi Yasuda, MD, PhD on the behalf of the JROAD Investigators

**Supplementary Table. Validity indices for the DPC Data-Based Diagnosis Identification Stratified by the Hospital**

|                                            | <b>Number of patients meeting criteria (DPC/ Clinical data)</b> | <b>Sensitivity (95% CI)</b> | <b>PPV (95% CI)</b> | <b>Proportion of “Angina pectoris, unspecified” for AMI, “Heart failure unspecified” for HF</b> |
|--------------------------------------------|-----------------------------------------------------------------|-----------------------------|---------------------|-------------------------------------------------------------------------------------------------|
| AMI: Diagnostic criteria, ICD-10 code only |                                                                 |                             |                     |                                                                                                 |
| Hospital A                                 | 44/43                                                           | 83.7 (81.9–85.6) %          | 81.8 (79.9–83.7) %  | 7.5 %                                                                                           |
| Hospital B                                 | 165/171                                                         | 74.3 (72.4–76.1) %          | 77.0 (75.2–78.7) %  | 84.8 %                                                                                          |
| Hospital C                                 | 366/368                                                         | 75.5 (74.7–76.4) %          | 76.0 (75.1–76.8) %  | 30.3 %                                                                                          |
| Hospital D                                 | 103/99                                                          | 91.9 (90.6–93.2) %          | 88.3 (86.8–89.9) %  | 72.0 %                                                                                          |
| Hospital E                                 | 64/60                                                           | 88.3 (86.5–90.2) %          | 82.8 (80.6–85.0) %  | 7.7 %                                                                                           |
|                                            |                                                                 |                             |                     |                                                                                                 |
| HF: Diagnostic criteria, ICD-10 code only  |                                                                 |                             |                     |                                                                                                 |
| Hospital A                                 | 115/94                                                          | 55.3 (52.9–57.8) %          | 45.2 (42.7–47.7) %  | 15.8 %                                                                                          |
| Hospital B                                 | 322/212                                                         | 95.8 (94.9–96.6) %          | 63.0 (61.0–65.1) %  | 45.6 %                                                                                          |
| Hospital C                                 | 632/392                                                         | 85.2 (84.3–86.1) %          | 52.8 (51.5–54.2) %  | 9.5 %                                                                                           |
| Hospital D                                 | 200/149                                                         | 89.9 (88.5–91.3) %          | 67.0 (64.8–69.2) %  | 30.9 %                                                                                          |
| Hospital E                                 | 117/86                                                          | 77.9 (75.5–80.3) %          | 57.3 (54.4–60.2) %  | 4.4 %                                                                                           |

AMI, acute myocardial infarction; CI, confidence interval; DPC, Diagnosis Procedure Combination; ICD-10, International Classification of Diseases, 10th revision; HF, heart failure; PPV, positive predictive value
